# Supplementary material for: Patients’ experiences with the application of medical adhesives to the skin: a qualitative systematic review protocol
Source: HighWire-hosted journal article supplement (doi:10.1136/bmjopen-2023-073546), 2023-06-01
Supplement: bmjopen-2023-073546supp001_data_supplement.pdf [file bmjopen-2023-073546supp001_data_supplement.pdf]

**Ovid MEDLINE(R) and Epub Ahead of Print, In-Process, In-Data-Review & Other Non-Indexed Citations, Daily and Versions** January 1, 2012 to November 10, 2022  
11/11/2022

| SEARCH TERMS                |                                                                                                                                                                                                                                                                                                           | RESULTS |
|-----------------------------|-----------------------------------------------------------------------------------------------------------------------------------------------------------------------------------------------------------------------------------------------------------------------------------------------------------|---------|
| <b>Pain</b>                 |                                                                                                                                                                                                                                                                                                           |         |
| 1                           | Pain/ or Acute Pain/ or Pain, Procedural/ or Pain Measurement/ or Pain Management/ or Pain Threshold/                                                                                                                                                                                                     |         |
| 2                           | (pain* or ache* or aching or distress* or suffer* or itch* or discomfort* or anxious or anguished or agony or agonising or anxiety).ab,kf,ti.                                                                                                                                                             |         |
| 3                           | 1 or 2                                                                                                                                                                                                                                                                                                    |         |
| <b>Removal of dressings</b> |                                                                                                                                                                                                                                                                                                           |         |
| 4                           | Bandages/ or Bandages, Hydrocolloid/ or Occlusive Dressings/ or Adhesives/                                                                                                                                                                                                                                |         |
| 5                           | Device Removal/                                                                                                                                                                                                                                                                                           |         |
| 6                           | (remov* or redress* or chang* or select* or application* or cho?s* or apply* or "device deficienc*" or "adverse event*").ab,kf,ti.                                                                                                                                                                        |         |
| 7                           | 5 or 6                                                                                                                                                                                                                                                                                                    |         |
| 8                           | 4 and 7                                                                                                                                                                                                                                                                                                   |         |
| 9                           | ((fastener* or adhesive* or tape* or taping or bandaid* or bandag* or dressing* or mucilage* or "sticky past*" or gum or latex or adherent* or adhering or seal*) adj4 (remov* or redress* or chang* or select* or application* or cho?s* or apply* or "device deficienc*" or "adverse event*").ab,kf,ti. |         |
| <b>Combined Sets</b>        |                                                                                                                                                                                                                                                                                                           |         |
| 10                          | 8 or 9                                                                                                                                                                                                                                                                                                    |         |
| 11                          | 3 and 10                                                                                                                                                                                                                                                                                                  |         |
| 12                          | limit 11 to (yr="2012 -Current" and (danish or dutch or english or norwegian or swedish))                                                                                                                                                                                                                 | 1,703   |
